# Supplementary material
Source: PubMed Central journal article supplement (PMC5571302)
Supplement: AAC.00408-17_zac009176483s1.pdf [file AAC.00408-17_zac009176483s1.pdf]

Fig. S1 Supplementary to Fig. 1

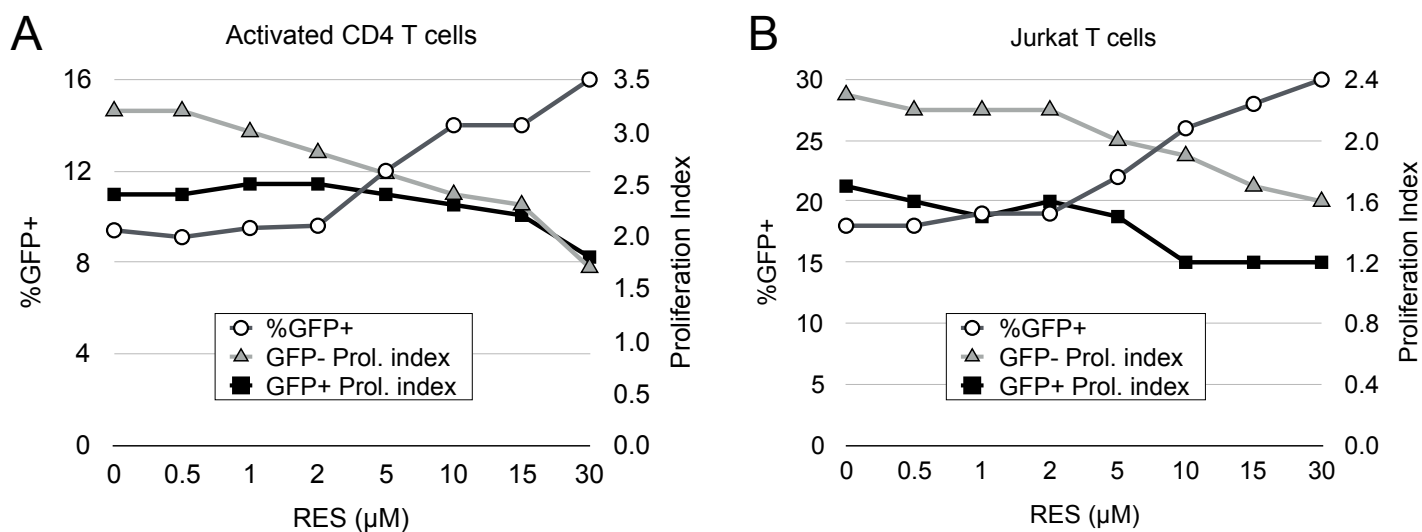

**Fig. S1. Inhibition of GFP negative cell proliferation correlates with the increase of the percent GFP+ cells amongst infected activated CD4 T cells and Jurkat T cells.**

**(A)** Primary CD4 T cells were stained with eFluor670 and then activated with PHA-L for 3 days before infection with HIV-1 and resveratrol treatment.

**(B)** Jurkat T cells were stained with eFluor670, infected with HIV-1 and treated with resveratrol. Flow cytometry was performed 2 days p.i.

Proliferation index was calculated using the Proliferation platform in FlowJo v9.9. Data are representative of 3 independent experiments using different cell donors.

Fig. S2 Supplementary to Fig. 2

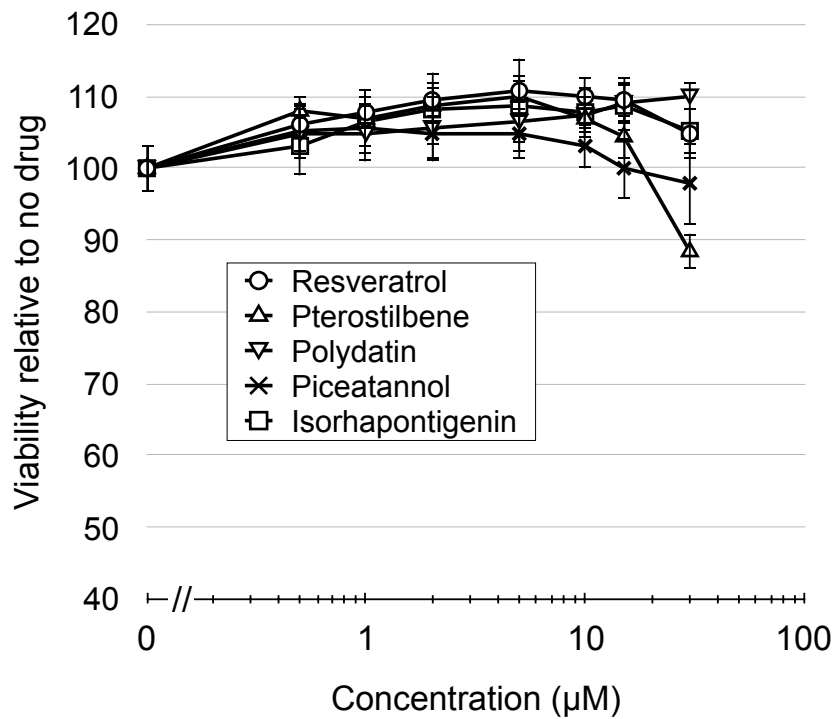

**Fig. S2. Supplementary to Fig. 2B The effect on cell viability of five stilbenoids.**

Cell viability in the flow cytometry data in Fig. 2B (day 5 post infection) was determined by forward and side scatter profile and normalized to a DMSO control (0 µM drug concentration). Data represent means and standard deviations from 3 independent experiments using different cell donors.

Fig. S3 Supplementary to Fig. 7

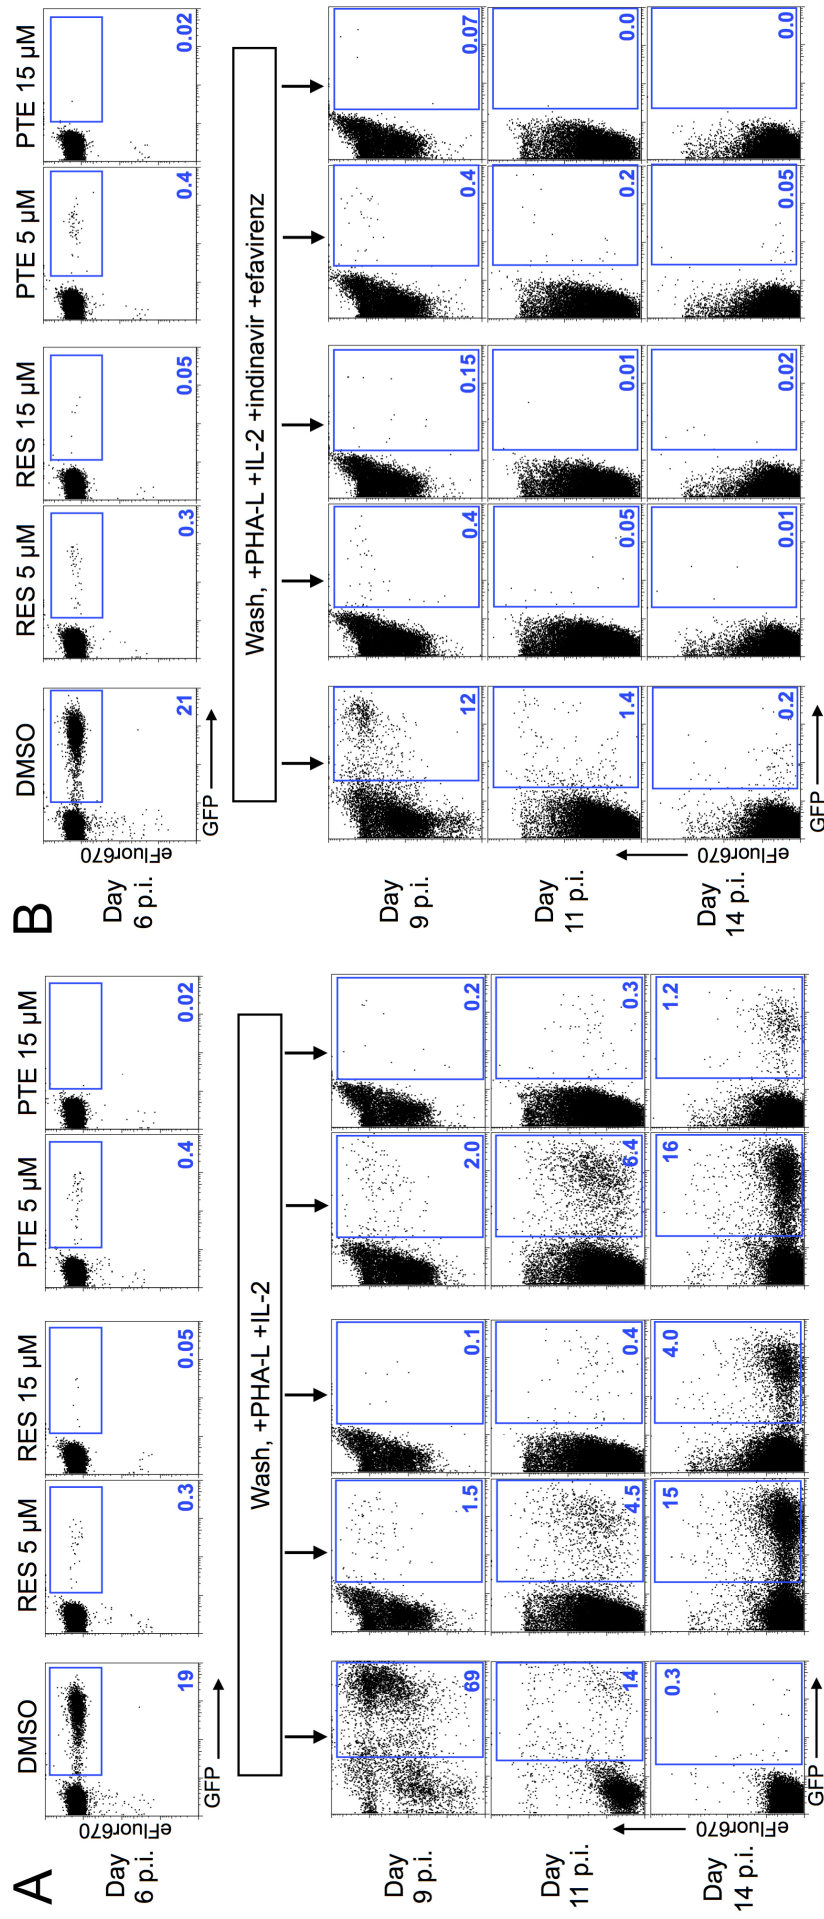

Fig. S3. Flow cytometry data for Fig. 7. (A) is graphed in Fig. 7B. (B) is graphed in Fig. 7C.

Fig. S4 Supplementary to Fig. 8

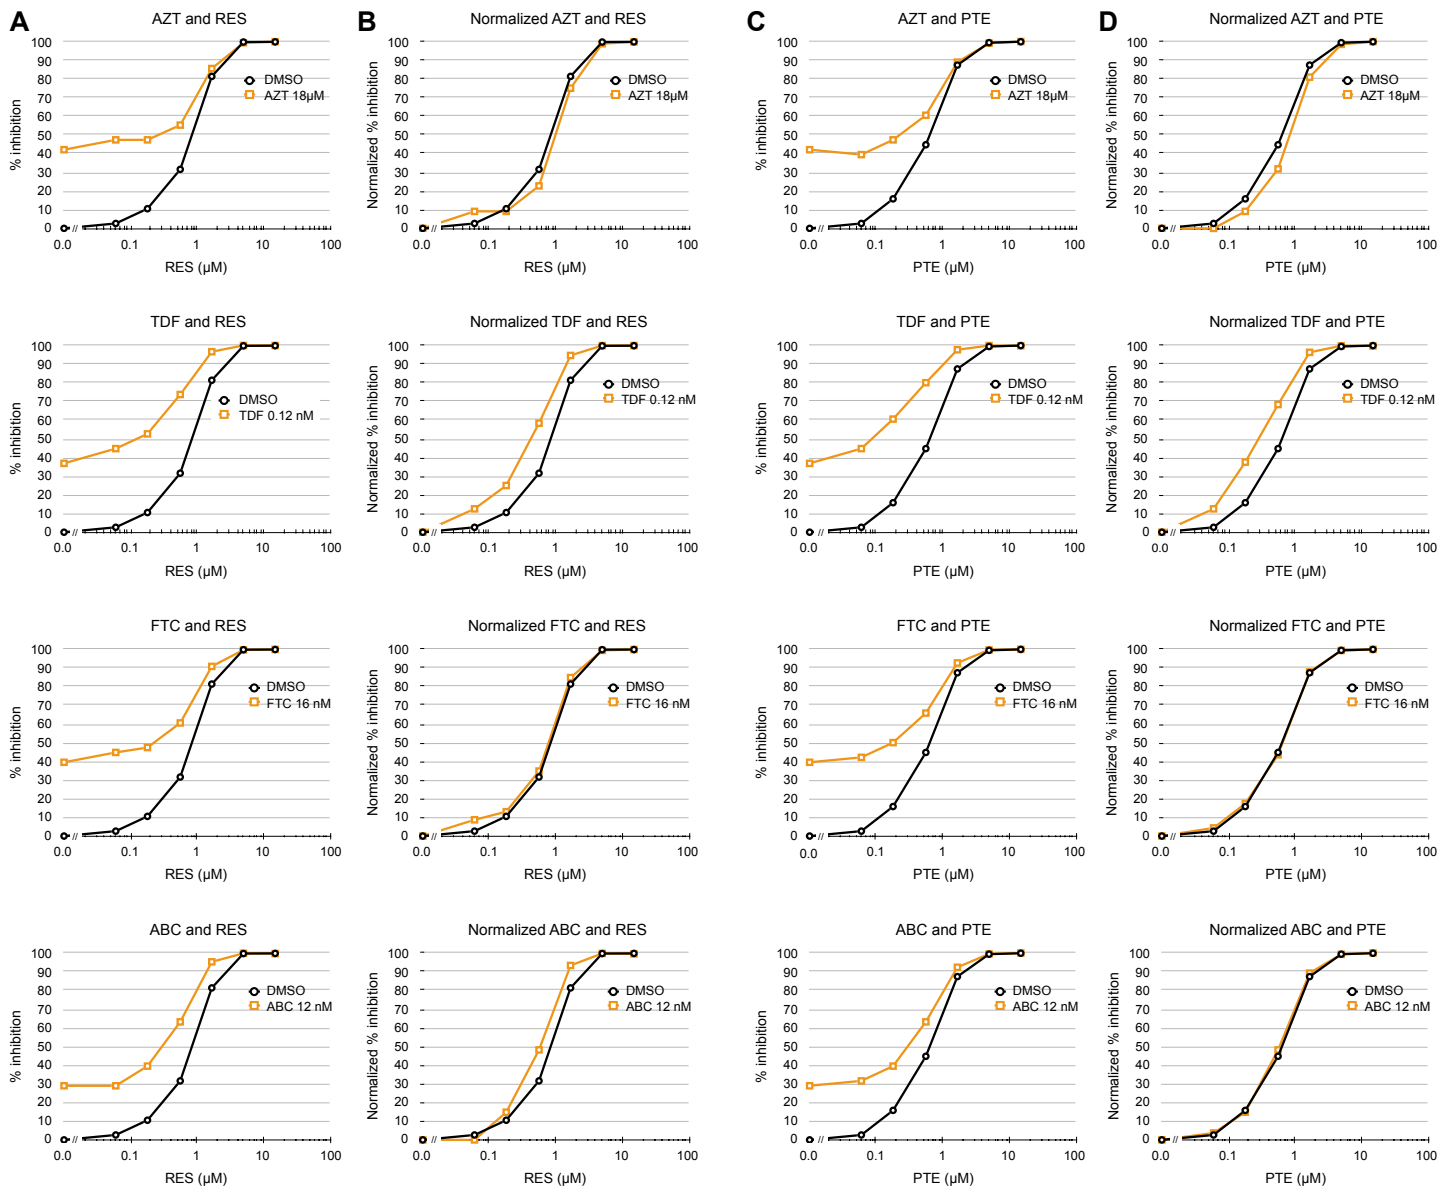

**Fig. S4, supplementary to Fig. 8.** Results from one of three cell donors utilized for Fig. 8, showing raw data (A, C) and normalization for synergy analysis (B, D). Titration of resveratrol (A) and pterostilbene (C) in the presence or absence of the indicated NRTI at the indicated dose (AZT = zidovudine; TDF = tenofovir disoproxil fumarate; FTC = emtricitabine; ABC = abacavir). Antiviral effect is expressed as % inhibition compared to DMSO, no NRTI control. To determine synergy between NRTI and stilbenoids, % inhibition of resveratrol + NRTI (B) and pterostilbene + NRTI (D) were normalized to the % inhibition of each NRTI alone. The normalized % inhibition values were then used to determine IC<sub>50</sub> and C<sub>90</sub> values shown in Fig. 8.
